# Supplementary material
Source: PubMed Central journal article supplement (PMC3427126)
Supplement: 1203686109_pnas.201203686SI.pdf [file 1203686109_pnas.201203686SI.pdf]

# Supporting Information

Galimba et al. 10.1073/pnas.1203686109

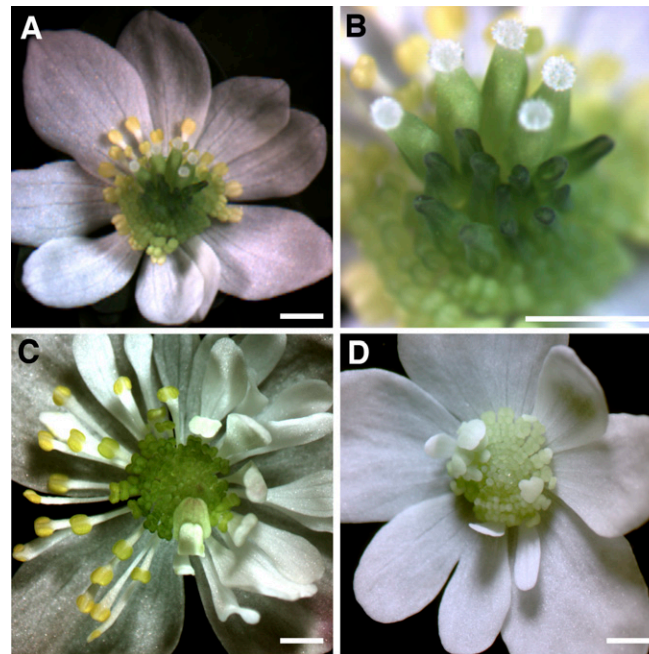

**Fig. S1.** Incomplete silencing effects on TRV2-*ThtAG1*-treated flowers of *Thalictrum thalictroides*. (A) Weak carpel phenotype consisting of open carpels without stigmas in lower half of flower center. (B) Detail of flower center in A. (C) Partial homeotic conversion of stamens in right half of the flower; (D) Homeotic organs among stamens. (Scale bars: 1 mm.)

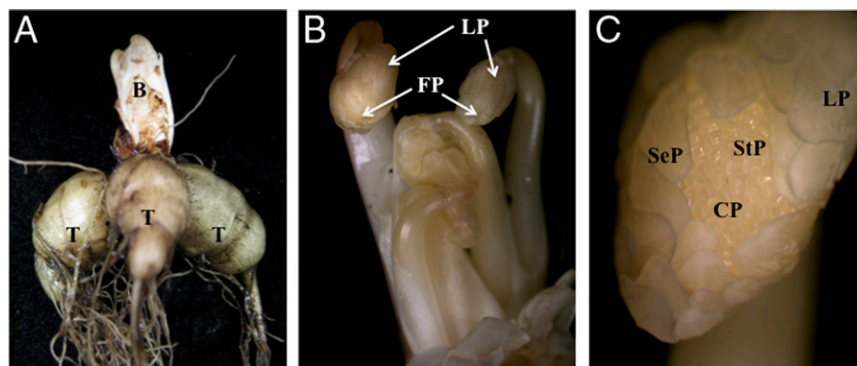

**Fig. S2.** Tubers with floral primordia. (A) Large cluster of radially arranged tubers (T) supporting one bud (B) on the proximal end, containing primordia protected by enclosing bracts. (B) Floral (FP) and leaf (LP) primordia in various stages of development with bracts removed. (C) Floral primordium showing differentiated carpel (CP), stamen (StP), and sepal (SeP) primordia, with leaf primordia (LP) enveloping the flower.

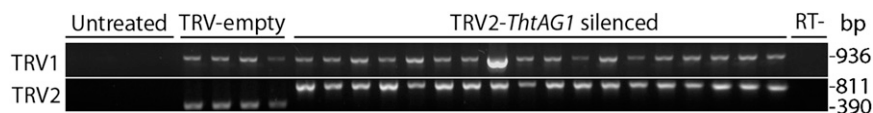

**Fig. S3.** Detection of TRV transcripts in virus-induced gene silencing (VIGS)-treated flowers showing homeotic phenotypes. RT-PCR with TRV1- and TRV2-specific primers on untreated ( $n = 4$ ), mock-treated ( $n = 4$ ), and VIGS-treated silenced plants ( $n = 18$ ). The smaller band in TRV2-empty plants corresponds to the distance between primers spanning the MCS region in the absence of a target-gene insert; the difference between this band and the bigger band in treated plants corresponds to the length of the target-gene insert (421 bp). A reverse-transcription control confirms the lack of genomic DNA contamination. Size of PCR products, in base pairs (bp), is indicated on the right side.

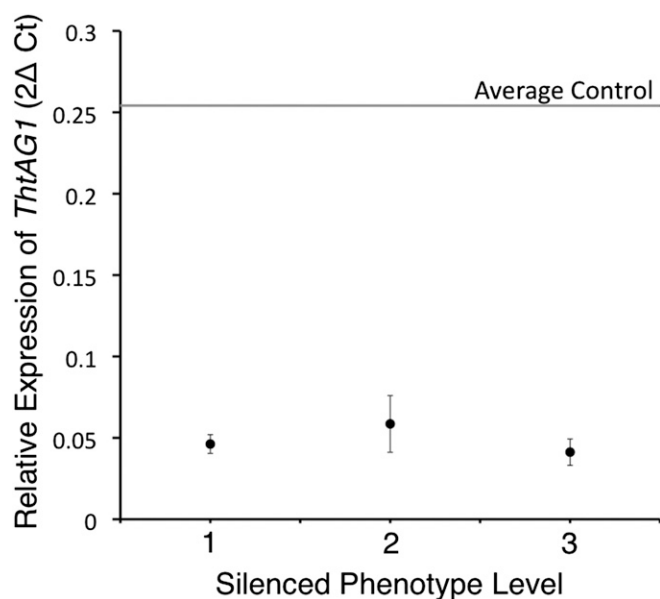

**Fig. S4.** Relative levels of *ThtAG1* transcript by quantitative PCR in VIGS flowers with increasing intensity of homeotic phenotypes. TRV2-*ThtAG1*-treated flowers in Fig. 3 have been divided according to the intensity of their homeotic phenotype. Mean and SE of phenotype level 1 ( $n = 9$ ), level 2 ( $n = 20$ ), and level 3 ( $n = 6$ ) are shown, normalized with the housekeeping genes *ThtACTIN* and *ThtEEF1*. Average control line represents the mean expression of untreated and empty TRV2 plants (in Fig. 3). The different VIGS phenotypes express comparable amounts of *ThtAG1*. Differences were not significant in a one-way ANOVA;  $P = 0.78$ ,  $F = 0.25$ . See main text for description of phenotype categories.

| BD \ AD                        | <i>ThtAG1</i> <sub>Δ3</sub> | <i>ThtAG1</i> | <i>ThtAG1</i> <sub>Δ3Δ13</sub> | <i>ThtAG1</i> <sub>Δ8</sub> | <i>ThtSEP3</i> | <i>ThtSEP3</i> ΔC | Δ     |
|--------------------------------|-----------------------------|---------------|--------------------------------|-----------------------------|----------------|-------------------|-------|
| <i>ThtAG1</i> <sub>Δ3</sub>    | ●●●●●                       | ●●●●●         | ●●●●●                          | ●●●●●                       | ●●●●●          | ●●●●●             | ●●●●● |
| <i>ThtAG1</i>                  | ●●●●●                       | ●●●●●         | ●●●●●                          | ●●●●●                       | ●●●●●          | ●●●●●             | ●●●●● |
| <i>ThtAG1</i> <sub>Δ3Δ13</sub> | ●●●●●                       | ●●●●●         | ●●●●●                          | ●●●●●                       | ●●●●●          | ●●●●●             | ●●●●● |
| <i>ThtAG1</i> <sub>Δ8</sub>    | ●●●●●                       | ●●●●●         | ●●●●●                          | ●●●●●                       | ●●●●●          | ●●●●●             | ●●●●● |
| <i>ThtSEP3</i> ΔC              | ●●●●●                       | ●●●●●         | ●●●●●                          | ●●●●●                       | ●●●●●          | ●●●●●             | ●●●●● |
| Δ                              | ●●●●●                       | ●●●●●         | ●●●●●                          | ●●●●●                       | ●●●●●          | ●●●●●             | ●●●●● |

BD-*ThtSEP3*/AD-Δ ●●●●●

**Fig. S5.** Interactions among *Thalictrum* MADS-domain proteins as determined with the yeast two-hybrid system. Colony growth on selective -Leu/-Trp/-His + 3 mM 3-AT medium is shown. As in Fig. 5, yeast cells were spotted in 10-fold serial dilution (from left to right) for each interaction tested. Constructs that expressed proteins as fusions with the GAL4 activation domain (AD) are shown horizontally; constructs that express GAL4 binding-domain (BD) fusions are shown vertically. Δ, negative controls in which empty vectors that did not contain a MADS-box gene cDNA insert were used.

**Table S1.** Primers for amplification and sequencing of *ThtAG1* genomic locus from *T. thalictroides* wild type and 'Double White'

| Primer name                | Primer sequence                       |
|----------------------------|---------------------------------------|
| <i>ThtAG1</i> int-cloneF4  | 5'-GCAAACGAGAGAGCCCCAGAACAT-3'        |
| <i>ThtAG1</i> int-cloneR4  | 5'-TATAAGATAGGGAGAGATTAAGACACGGCAC-3' |
| <i>ThtAG1</i> int-cloneF5  | 5'-CAGCAAGAAGCGTCAAAACTG-3'           |
| <i>ThtAG1</i> int-cloneR5  | 5'-GCATATACTCTATCTCAGCAAACAGC-3'      |
| <i>ThtAG1</i> int-cloneF6  | 5'-AACTCTGGATCTGTTTCTGAAGCTAATG-3'    |
| <i>ThtAG1</i> int-cloneF7  | 5'-GTCTTCTACGCGTGGTCG-3'              |
| <i>ThtAG1</i> int-cloneR7  | 5'-CATTAGCTTCAGAAACAGATCCAGAGTT-3'    |
| <i>ThtAG1</i> int-cloneF8  | 5'-ATTTCTCTCTCTCTTGCTTTC-3'           |
| <i>ThtAG1</i> int-cloneR8  | 5'-GCCATCTCTGGTCTATTAATCC-3'          |
| <i>ThtAG1</i> int-cloneF9  | 5'-ATGCTTCACATAGAACCCTCG-3'           |
| <i>ThtAG1</i> int-cloneR9  | 5'-TTGGTTGCTTCTGATAGTC-3'             |
| <i>ThtAG1</i> int-cloneF10 | 5'-CCAAAGGGTAAGAATCAAGACC-3'          |
| <i>ThtAG1</i> int-cloneR10 | 5'-GCACATTATGCTCTGGG-3'               |

**Table S2. Primers for detection of expressed alleles of *ThtAG1* in individual plants of *Thalictrum thalictroides* wild type, 'Double White,' and 'Snowball'**

| Primer sequence              | Description                                                                                                      |
|------------------------------|------------------------------------------------------------------------------------------------------------------|
| 5'-GCTAATGTGCAGTTTTACCAGC-3' | AG1_allele_F1: binding in the $\Delta 3$ region (FYQ), designed to amplify only when the FYQ sequence is present |
| 5'-AAAGGGTGCAGAAGACATGAC-3'  | AG1_allele_R1_all: binding downstream of both deletions, designed to amplify all alleles                         |
| 5'-ATTCGGCTTCAAAGAAAAATG-3'  | AG1_allele_F2_all: binding upstream of both deletions, designed to amplify all alleles                           |
| 5'-GCTCCCTGATATTGAGATTGC-3'  | AG1_allele_R2: binding in $\Delta 13$ region. Designed to amplify only when $\Delta 13$ deletion is absent       |
| 5'-AGACTCCCCCAACTCTGGAT-3'   | AG1 allele test forward:: binding upstream of both deletions                                                     |
| 5'-TCTTTTTGGCTCGGATTTTG-3'   | AG1 allele test reverse: binding downstream of both deletions                                                    |

**Table S3. Primers for cloning of *T. thalictroides* MADS-box gene cDNAs into yeast two-hybrid vectors**

| Primer sequence                                    | Description                                                                                                                                                                                                                                |
|----------------------------------------------------|--------------------------------------------------------------------------------------------------------------------------------------------------------------------------------------------------------------------------------------------|
| 5'-TAGCGCGAAT TCATGGGAAG GGGAAAGATT GAAA-3'        | Binding at the beginning of the MADS box of <i>ThtAG1</i> ; used for cloning of <i>ThtAG1</i> ; <i>ThtAG1<math>\Delta 3</math></i> ; <i>ThtAG1<math>\Delta 8</math></i> ; <i>ThtAG1<math>\Delta 3\Delta 13</math></i> .                    |
| 5'-AATCGCGGAT CCCAAAAGCT TTCACAGAAT ATCACC-3'      | Binding at the end of the coding sequence and in the 3' UTR of <i>ThtAG1</i> ; used for cloning of <i>ThtAG1</i> ; <i>ThtAG1<math>\Delta 3</math></i> ; <i>ThtAG1<math>\Delta 8</math></i> ; <i>ThtAG1<math>\Delta 3\Delta 13</math></i> . |
| 5'-AGTGTAAGT TCAGCCATGG GAAGGGGAAA GATTGAA-3'      | Binding at the beginning of the MADS box of <i>ThtAG1</i> ; used for cloning of <i>ThtAG1</i> ; <i>ThtAG1<math>\Delta 3\Delta 13</math></i> .                                                                                              |
| 5'-ACTGCAGTCG ACCACAGAAT ATCACCCAAG TTG-3'         | Binding at the end of the coding sequence and in the 3' UTR of <i>ThtAG1</i> ; used for cloning of <i>ThtAG1</i> ; <i>ThtAG1<math>\Delta 3\Delta 13</math></i> .                                                                           |
| 5'-CCTAGTGAAT TCATGGGAAG AGGAAGAGTT GAGT-3'        | Binding at the beginning of the MADS box of <i>ThtSEP3</i> ; used for cloning of <i>ThtSEP3</i> and <i>ThtSEP3<math>\Delta C</math></i> .                                                                                                  |
| 5'-AGTCGAGAAT TCAGCCATGG GAAGAGGAAG AGTTGAG-3'     | Binding at the beginning of the MADS box of <i>ThtSEP3</i> ; used for cloning of <i>ThtSEP3</i> .                                                                                                                                          |
| 5'-TAGCTTGAGC TCTTAAGGTA CGAGAGACAC CACT-3'        | Binding at the 3' UTR of <i>ThtSEP3</i> ; used for cloning of <i>ThtSEP3</i> .                                                                                                                                                             |
| 5'-CTATCAGTCG ACCTTGCGGA TCAGCTTCAG C-3'           | Binding at the 3' UTR of <i>ThtSEP3</i> ; used for cloning of <i>ThtSEP3</i> .                                                                                                                                                             |
| 5'-AAGCTTGAT CCGTCGACTT AATTTGGTTG GCTACCTCC TC-3' | Used for cloning of <i>ThtSEP3<math>\Delta C</math></i>                                                                                                                                                                                    |

Restriction enzyme recognition sites used for cloning are in italics.
